# Supplementary material for: Applicability of multi-criteria decision analysis in the site selection procedure for high-level radioactive waste final disposal: robustness-oriented comparison of emplacement concepts
Source: Copernicus journal article supplement (doi:10.5194/sand-2-169-2023), 2023-09-06
Supplement: Supplementary file 1 [file sand-2-169-2023-supplement.zip]

Archive with 3 entries (3 files):
- sand-2023-63_Slide_Applicability of Multi-Criteria Decision Analysis_Emplacement Concepts.pdf
- sand-2023-63_Poster_Applicability of Multi-Criteria Decision Analysis_Emplacement Concepts.pdf
- sand-2-169-2023-supplement-title-page.pdf
