# Supplementary material for: Applicability of multi-criteria decision analysis in the site selection procedure for high-level radioactive waste final disposal: robustness-oriented comparison of emplacement concepts
Source: Copernicus journal article supplement (doi:10.5194/sand-2-169-2023), 2023-09-06
Supplement: Supplementary file 1 [file sand-2-169-2023-supplement.zip › sand-2-169-2023-supplement-title-page.pdf]

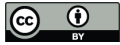

*Supplement of*

## **Applicability of multi-criteria decision analysis in the site selection procedure for high-level radioactive waste final disposal: robustness-oriented comparison of emplacement concepts**

**Kurt Diedrich et al.**

*Correspondence to:* Kurt Diedrich ([diedrich@els.rwth-aachen.de](mailto:diedrich@els.rwth-aachen.de))

- [sand-2-169-2023-supplement-title-page.pdf](#)
- [sand-2023-63\\_Poster\\_Applicability of Multi-Criteria Decision Analysis\\_Emplacement Concepts.pdf](#)
- [sand-2023-63\\_Slide\\_Applicability of Multi-Criteria Decision Analysis\\_Emplacement Concepts.pdf](#)

The copyright of individual parts of the supplement might differ from the article licence.
