# Supplementary material for: Applicability of multi-criteria decision analysis in the site selection procedure for high-level radioactive waste final disposal: robustness-oriented comparison of emplacement concepts
Source: Copernicus journal article supplement (doi:10.5194/sand-2-169-2023), 2023-09-06
Supplement: Supplementary file 1 [file sand-2-169-2023-supplement.zip › sand-2023-63_Poster_Applicability of Multi-Criteria Decision Analysis_Emplacement Concepts.pdf]

# Applicability of Multi-Criteria Decision Analysis in the Site Selection Procedure for HLW Final Disposal

## Robustness-Oriented Comparison of Emplacement Concepts

Kurt Diedrich, Klaus Fischer-Appelt, Frank Charlier, Sarah Weihmann  
Chair of Repository Safety (ELS), RWTH Aachen University, Aachen, Germany  
Correspondence to: diedrich@els.rwth-aachen.de

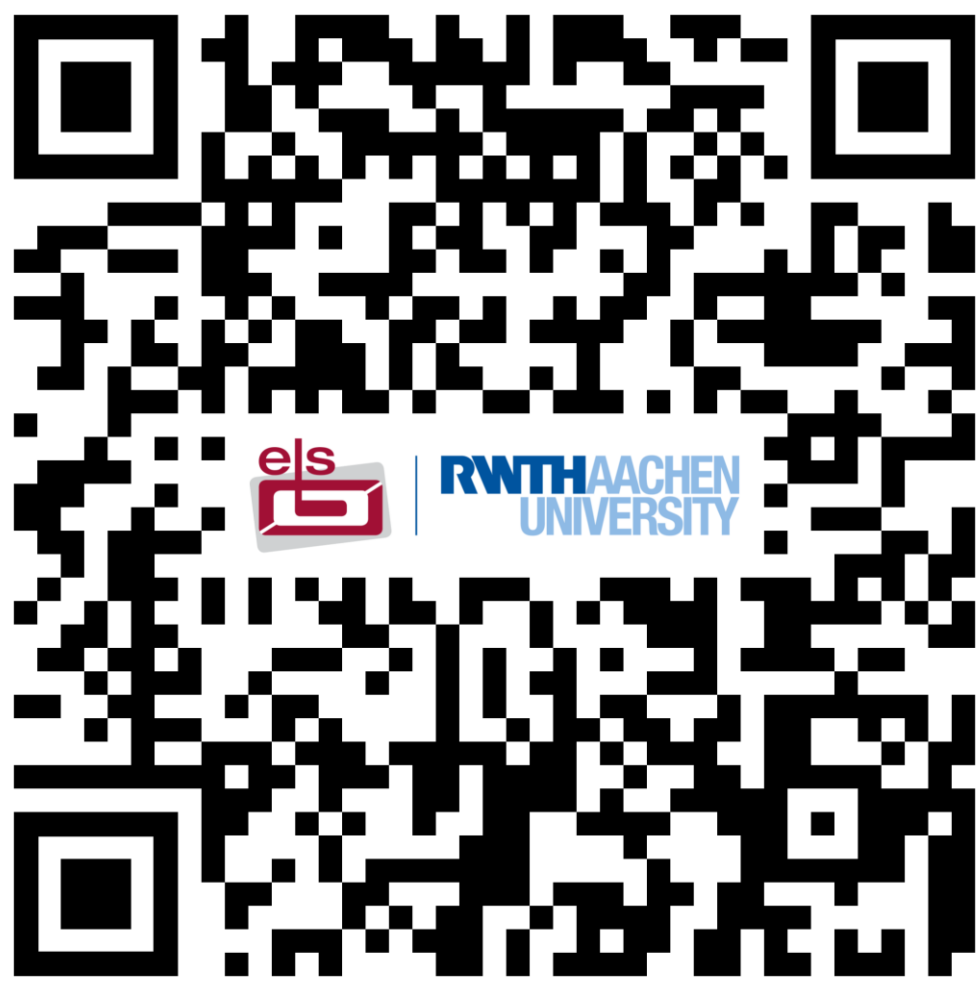

### BACKGROUND

- Decision Problem: determining emplacement concept for HLW packages
- Involves geological, engineering, operational safety and human factors
- In Germany:
  - verbal-argumentative decision-making approach is practiced
  - preference currently tends towards drift emplacement concept (BGE, 2022)

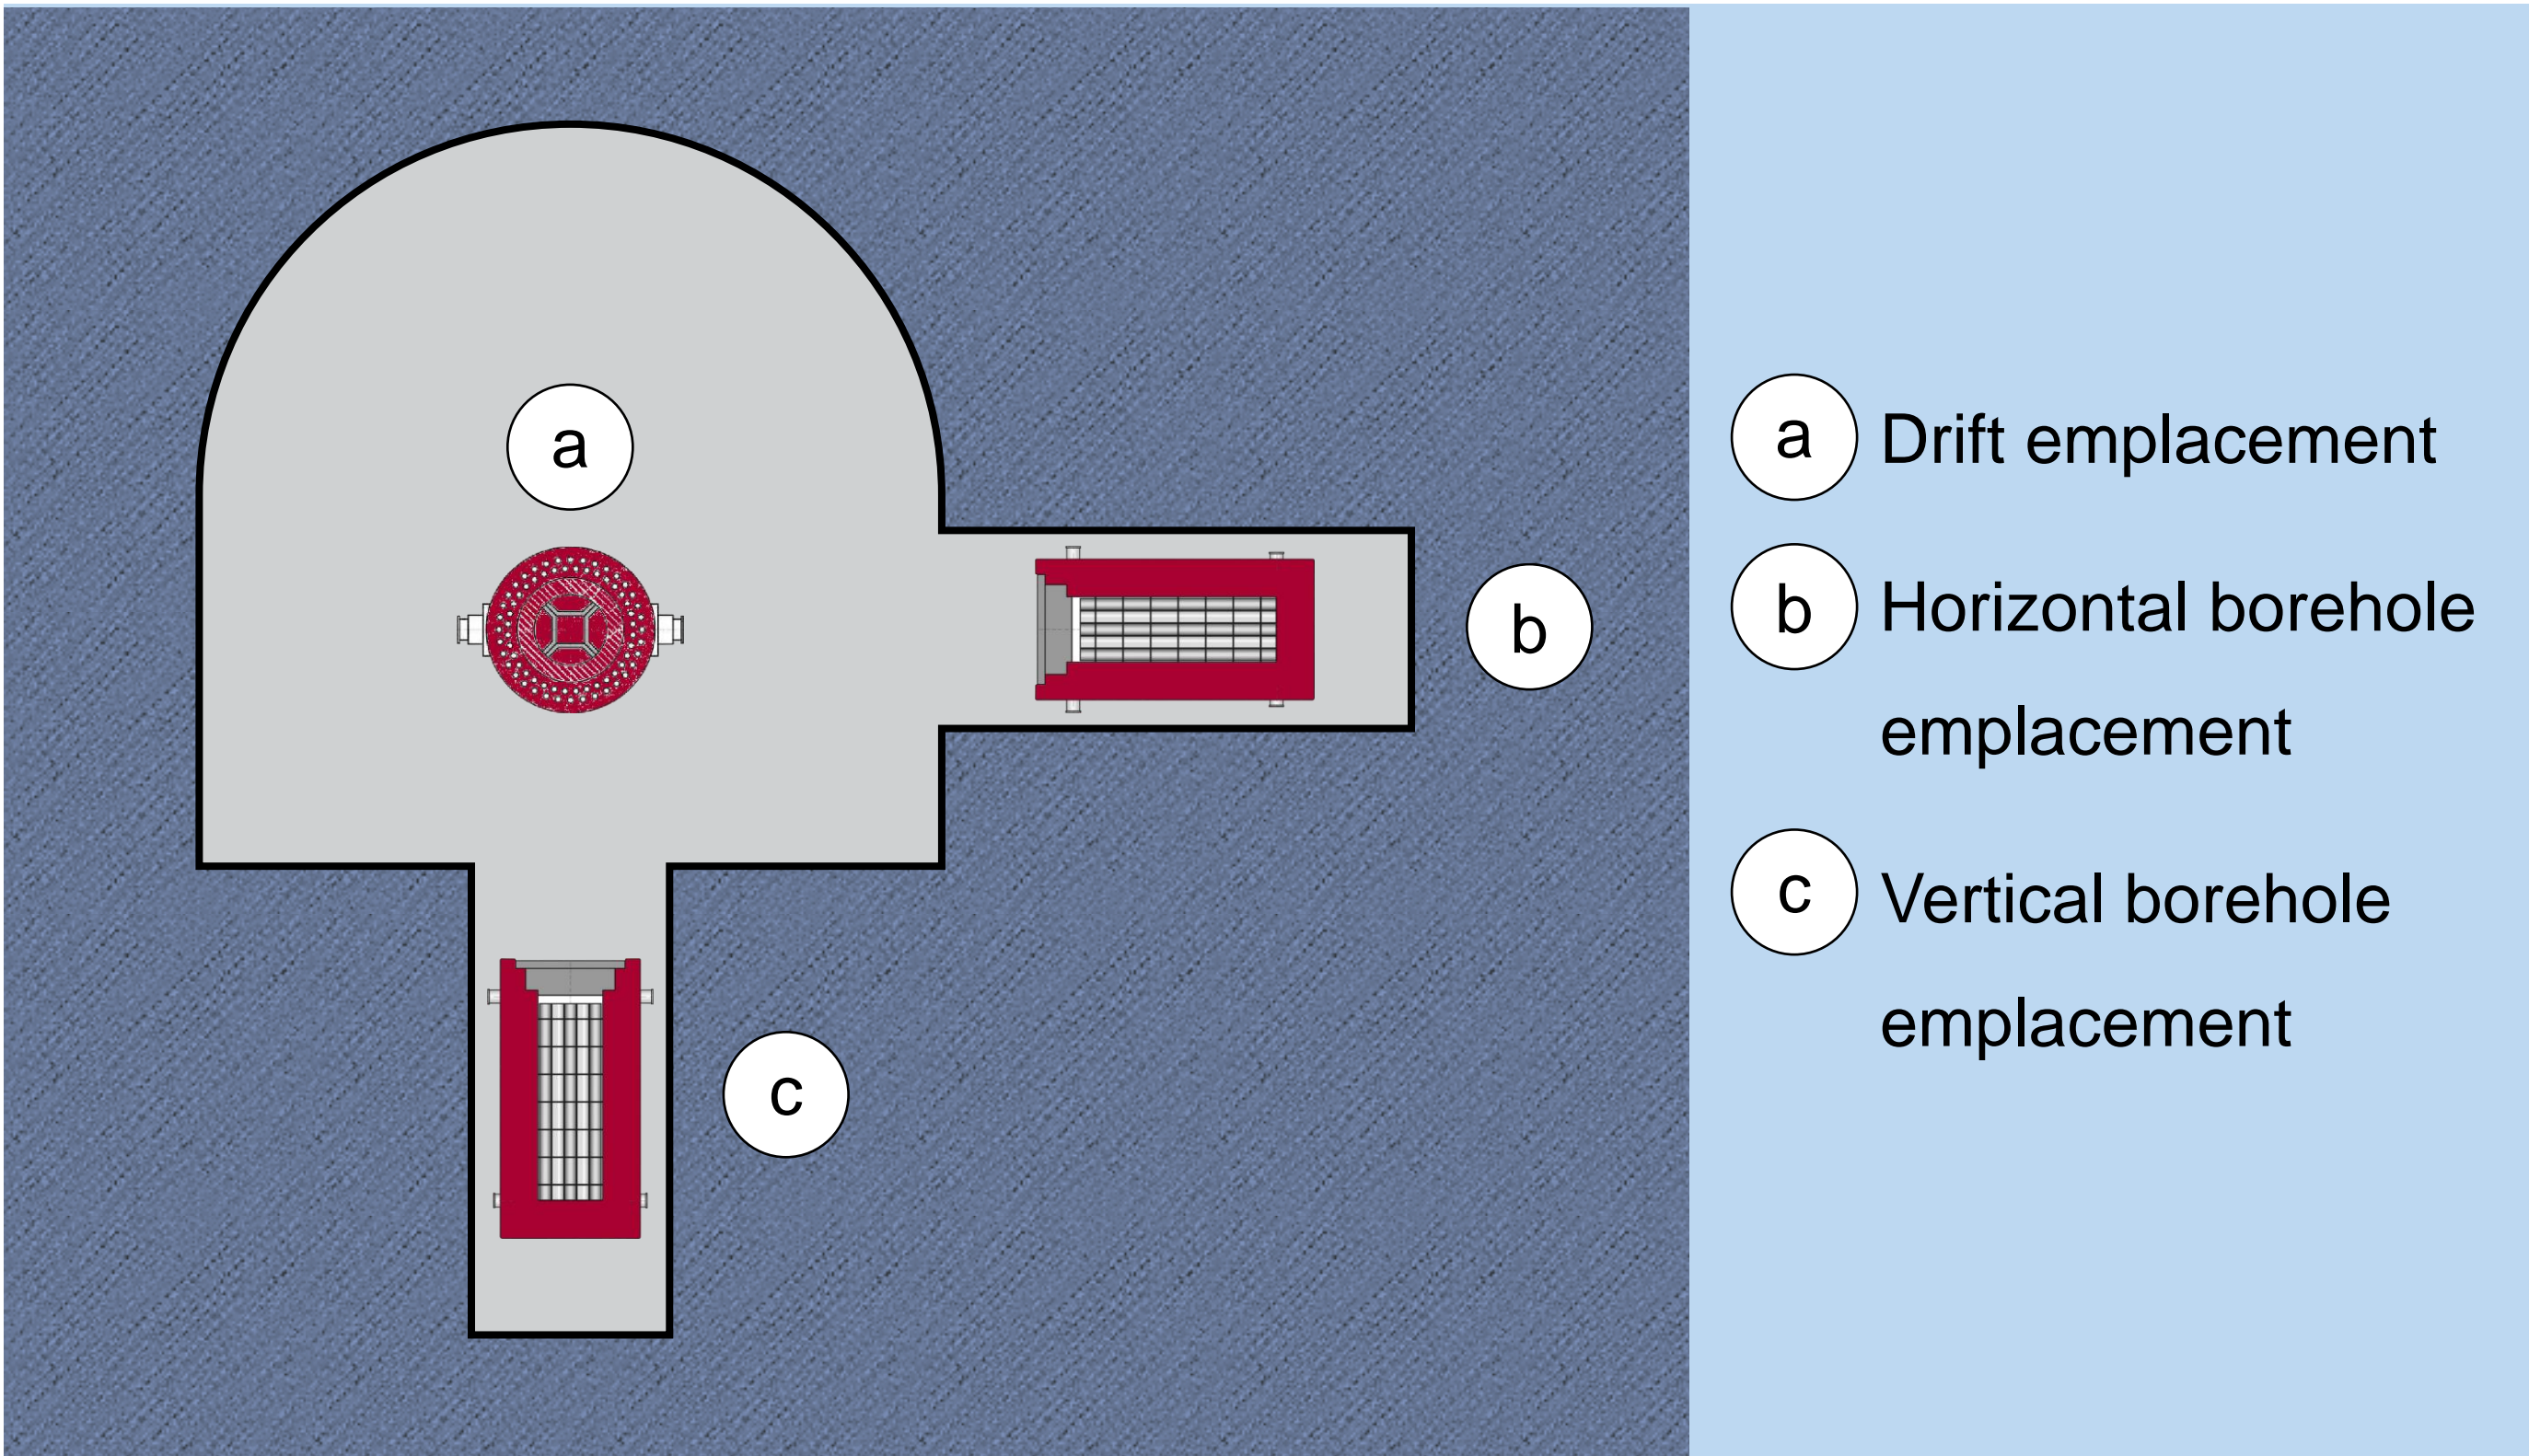

Fig. 1: Sketch of the three general emplacement concepts for final disposal of HLW packages.

### OBJECTIVE

- Goal**
- Development of a decision model for comparison of robust emplacement concepts for HLW final disposal
  - Integration of MCDA method
  - Appropriateness test within the context of the emplacement concept
- Research Question**
- What methodological steps are necessary to successfully conduct a comparison using MCDA methods?
  - Which criteria are relevant for a robustness-directed comparison?
  - How should these criteria be weighted for a cross-host rock comparison?
  - To what extent is the development of the decision model feasible and practical with integrating MCDA methods?
- Benefit**
- Supporting decision-makers (Frieling et al., 2020)
  - Achieving and enhancing temporal and financial efficiency during site selection
  - Increasing of transparency, understanding and acceptance

### METHOD

#### MCDA – Multi-Criteria Decision Analysis

Methods which can support complex decision problems assessing multiple criteria to evaluate the best available alternative or to define the optimal alternative.

Tab. 1: Generalized and simplified application of MCDA for the case of apple decision-making.

| Criteria |         | Weight | Alternative   |               |               |
|----------|---------|--------|---------------|---------------|---------------|
|          |         |        | A             | B             | C             |
| 4        |         | 100 %  |               |               |               |
| C 1      | Cost    | 15 %   | 1<br>(medium) | 1<br>(medium) | 2<br>(low)    |
| C 2      | Origin  | 15 %   | 1<br>(?)      | 0<br>(far)    | 2<br>(local)  |
| C 3      | Quality | 25 %   | 1<br>(good)   | 2<br>(high)   | 0<br>(low)    |
| C 4      | Taste   | 45 %   | 2<br>(good)   | 2<br>(good)   | 1<br>(medium) |

|        |      |      |      |      |
|--------|------|------|------|------|
| C 1    | 0,15 | 0,15 | 0,30 | 0,30 |
| C 2    | 0,15 | 0,15 | 0,00 | 0,30 |
| C 3    | 0,25 | 0,25 | 0,50 | 0,00 |
| C 4    | 0,45 | 0,90 | 0,90 | 0,45 |
| Result | 1    | 1,45 | 1,70 | 1,05 |

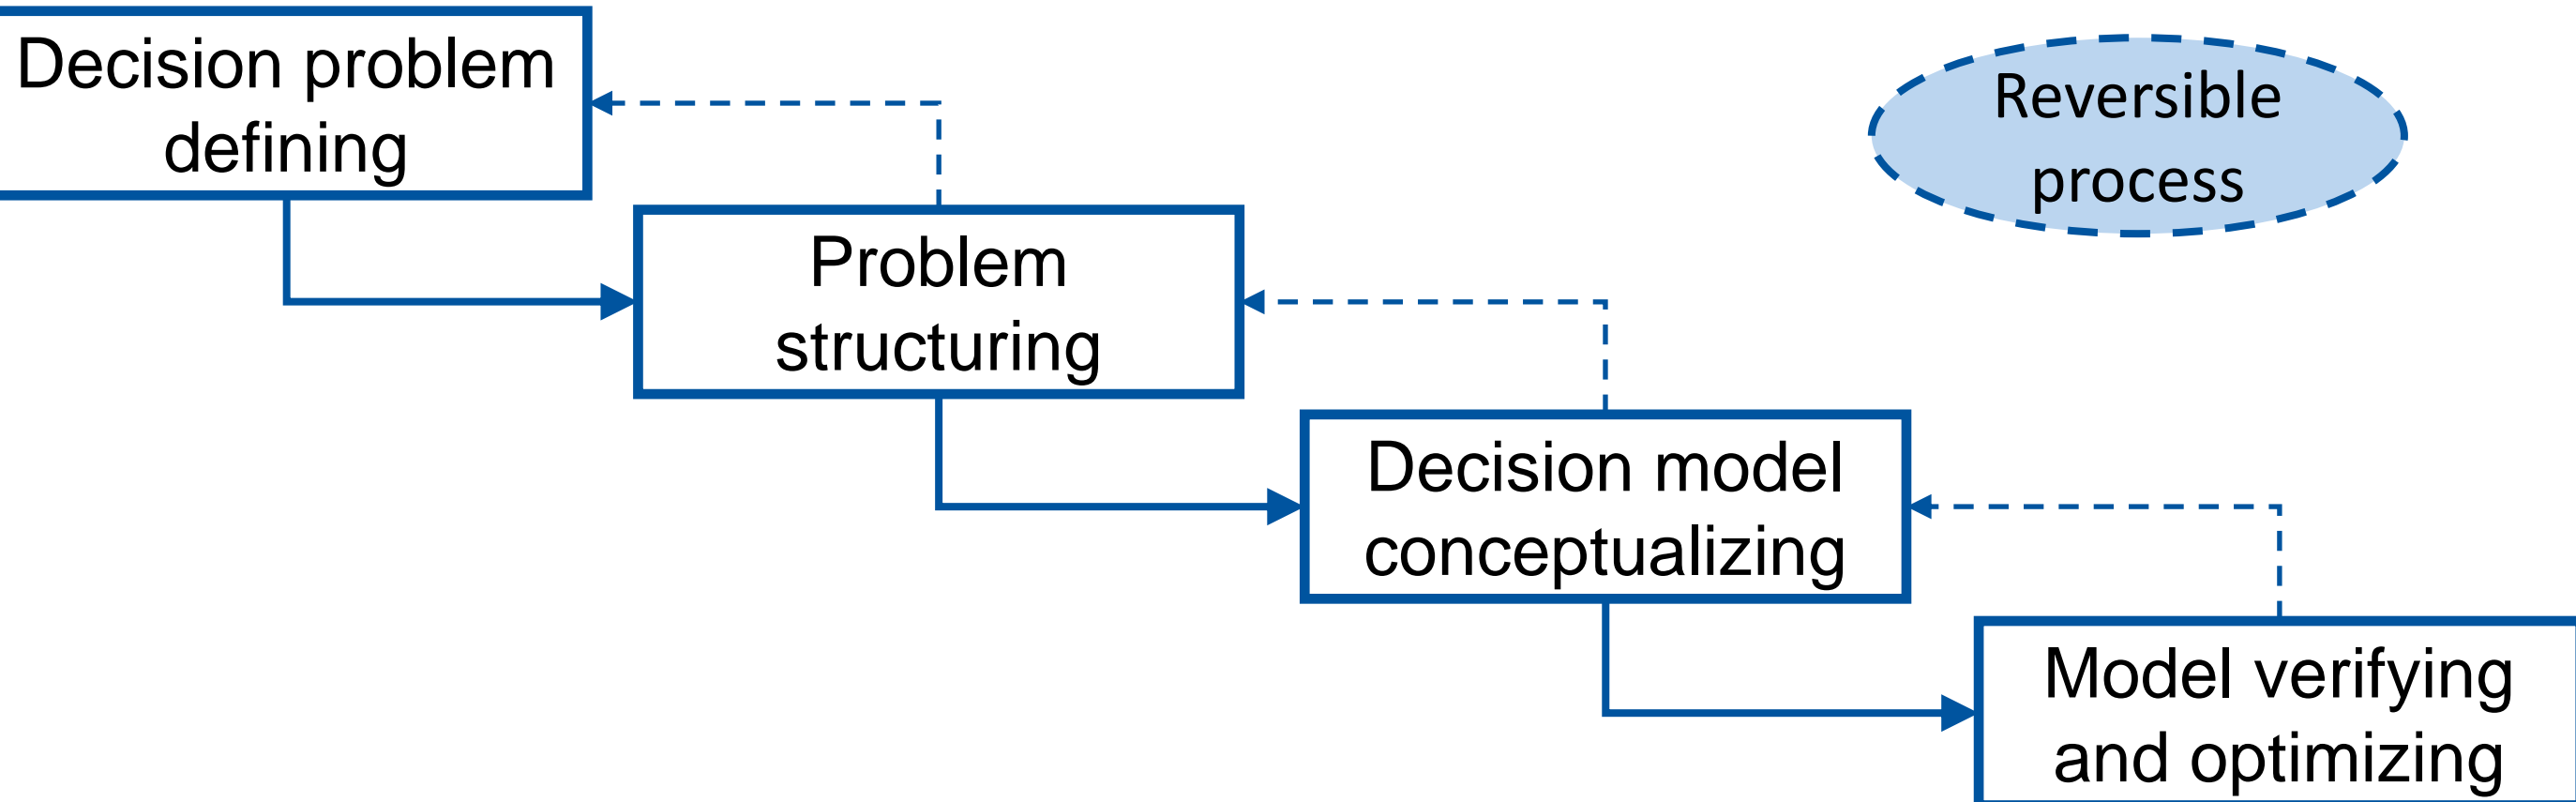

Fig. 2: General methodology for decision model development (adapted from Belton and Stewart, 2003).

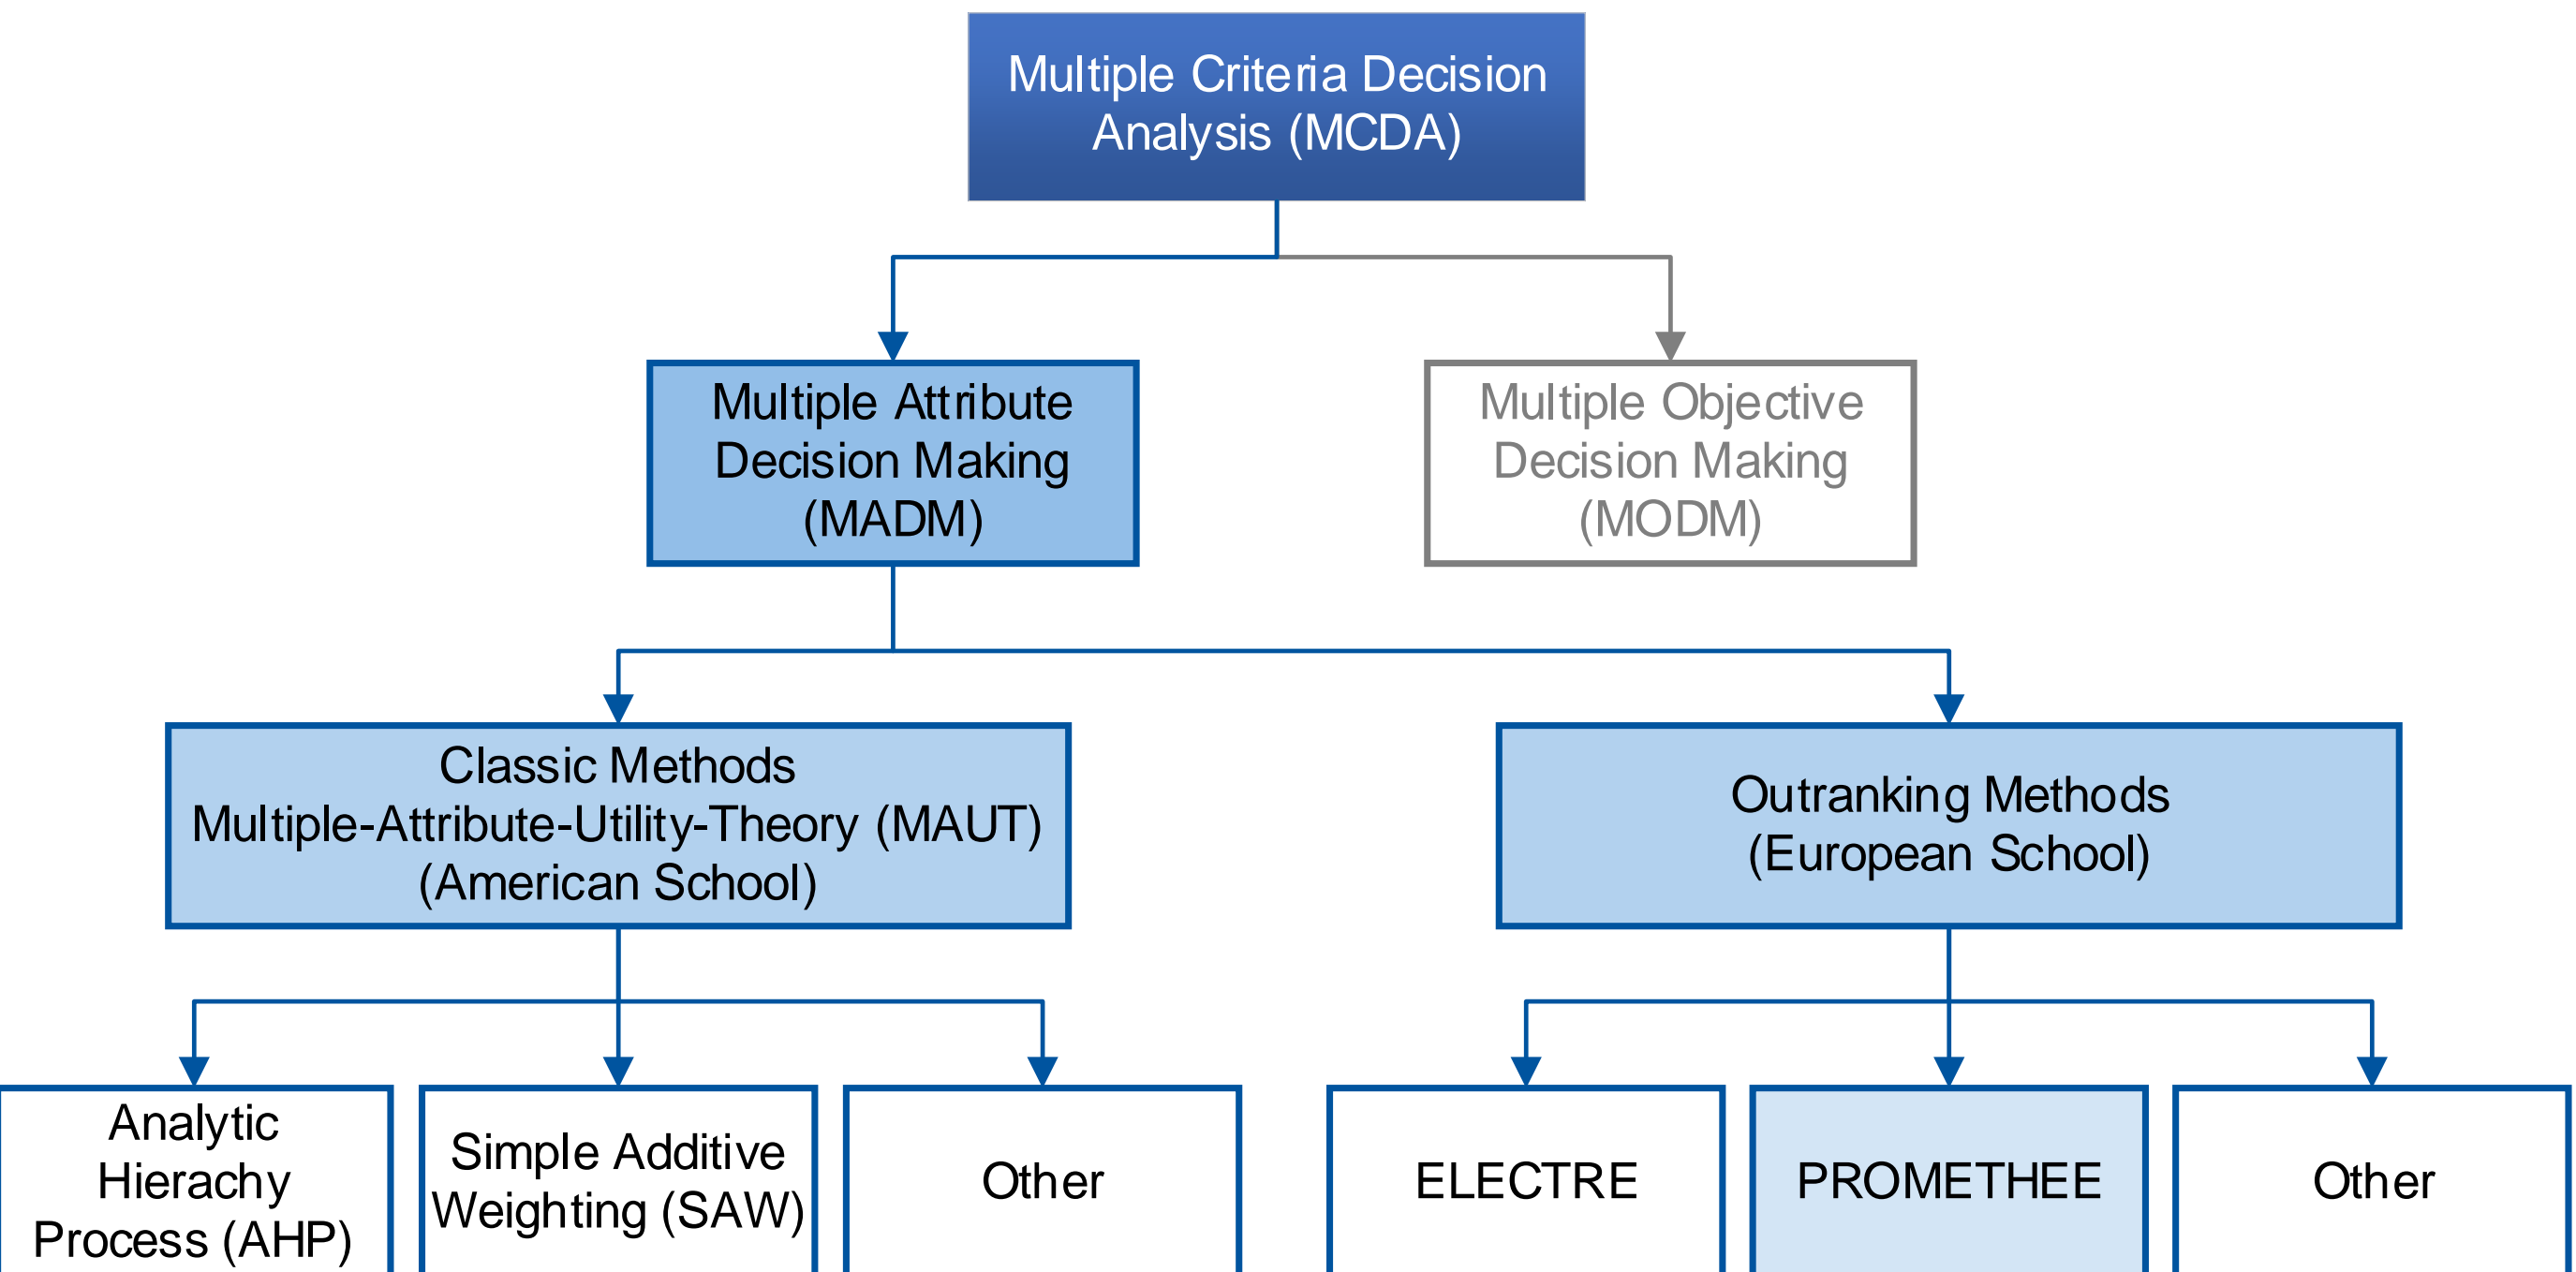

Fig. 3: Classification of MCDA methods (adapted from Frieling et al., 2020).

### OUTLOOK

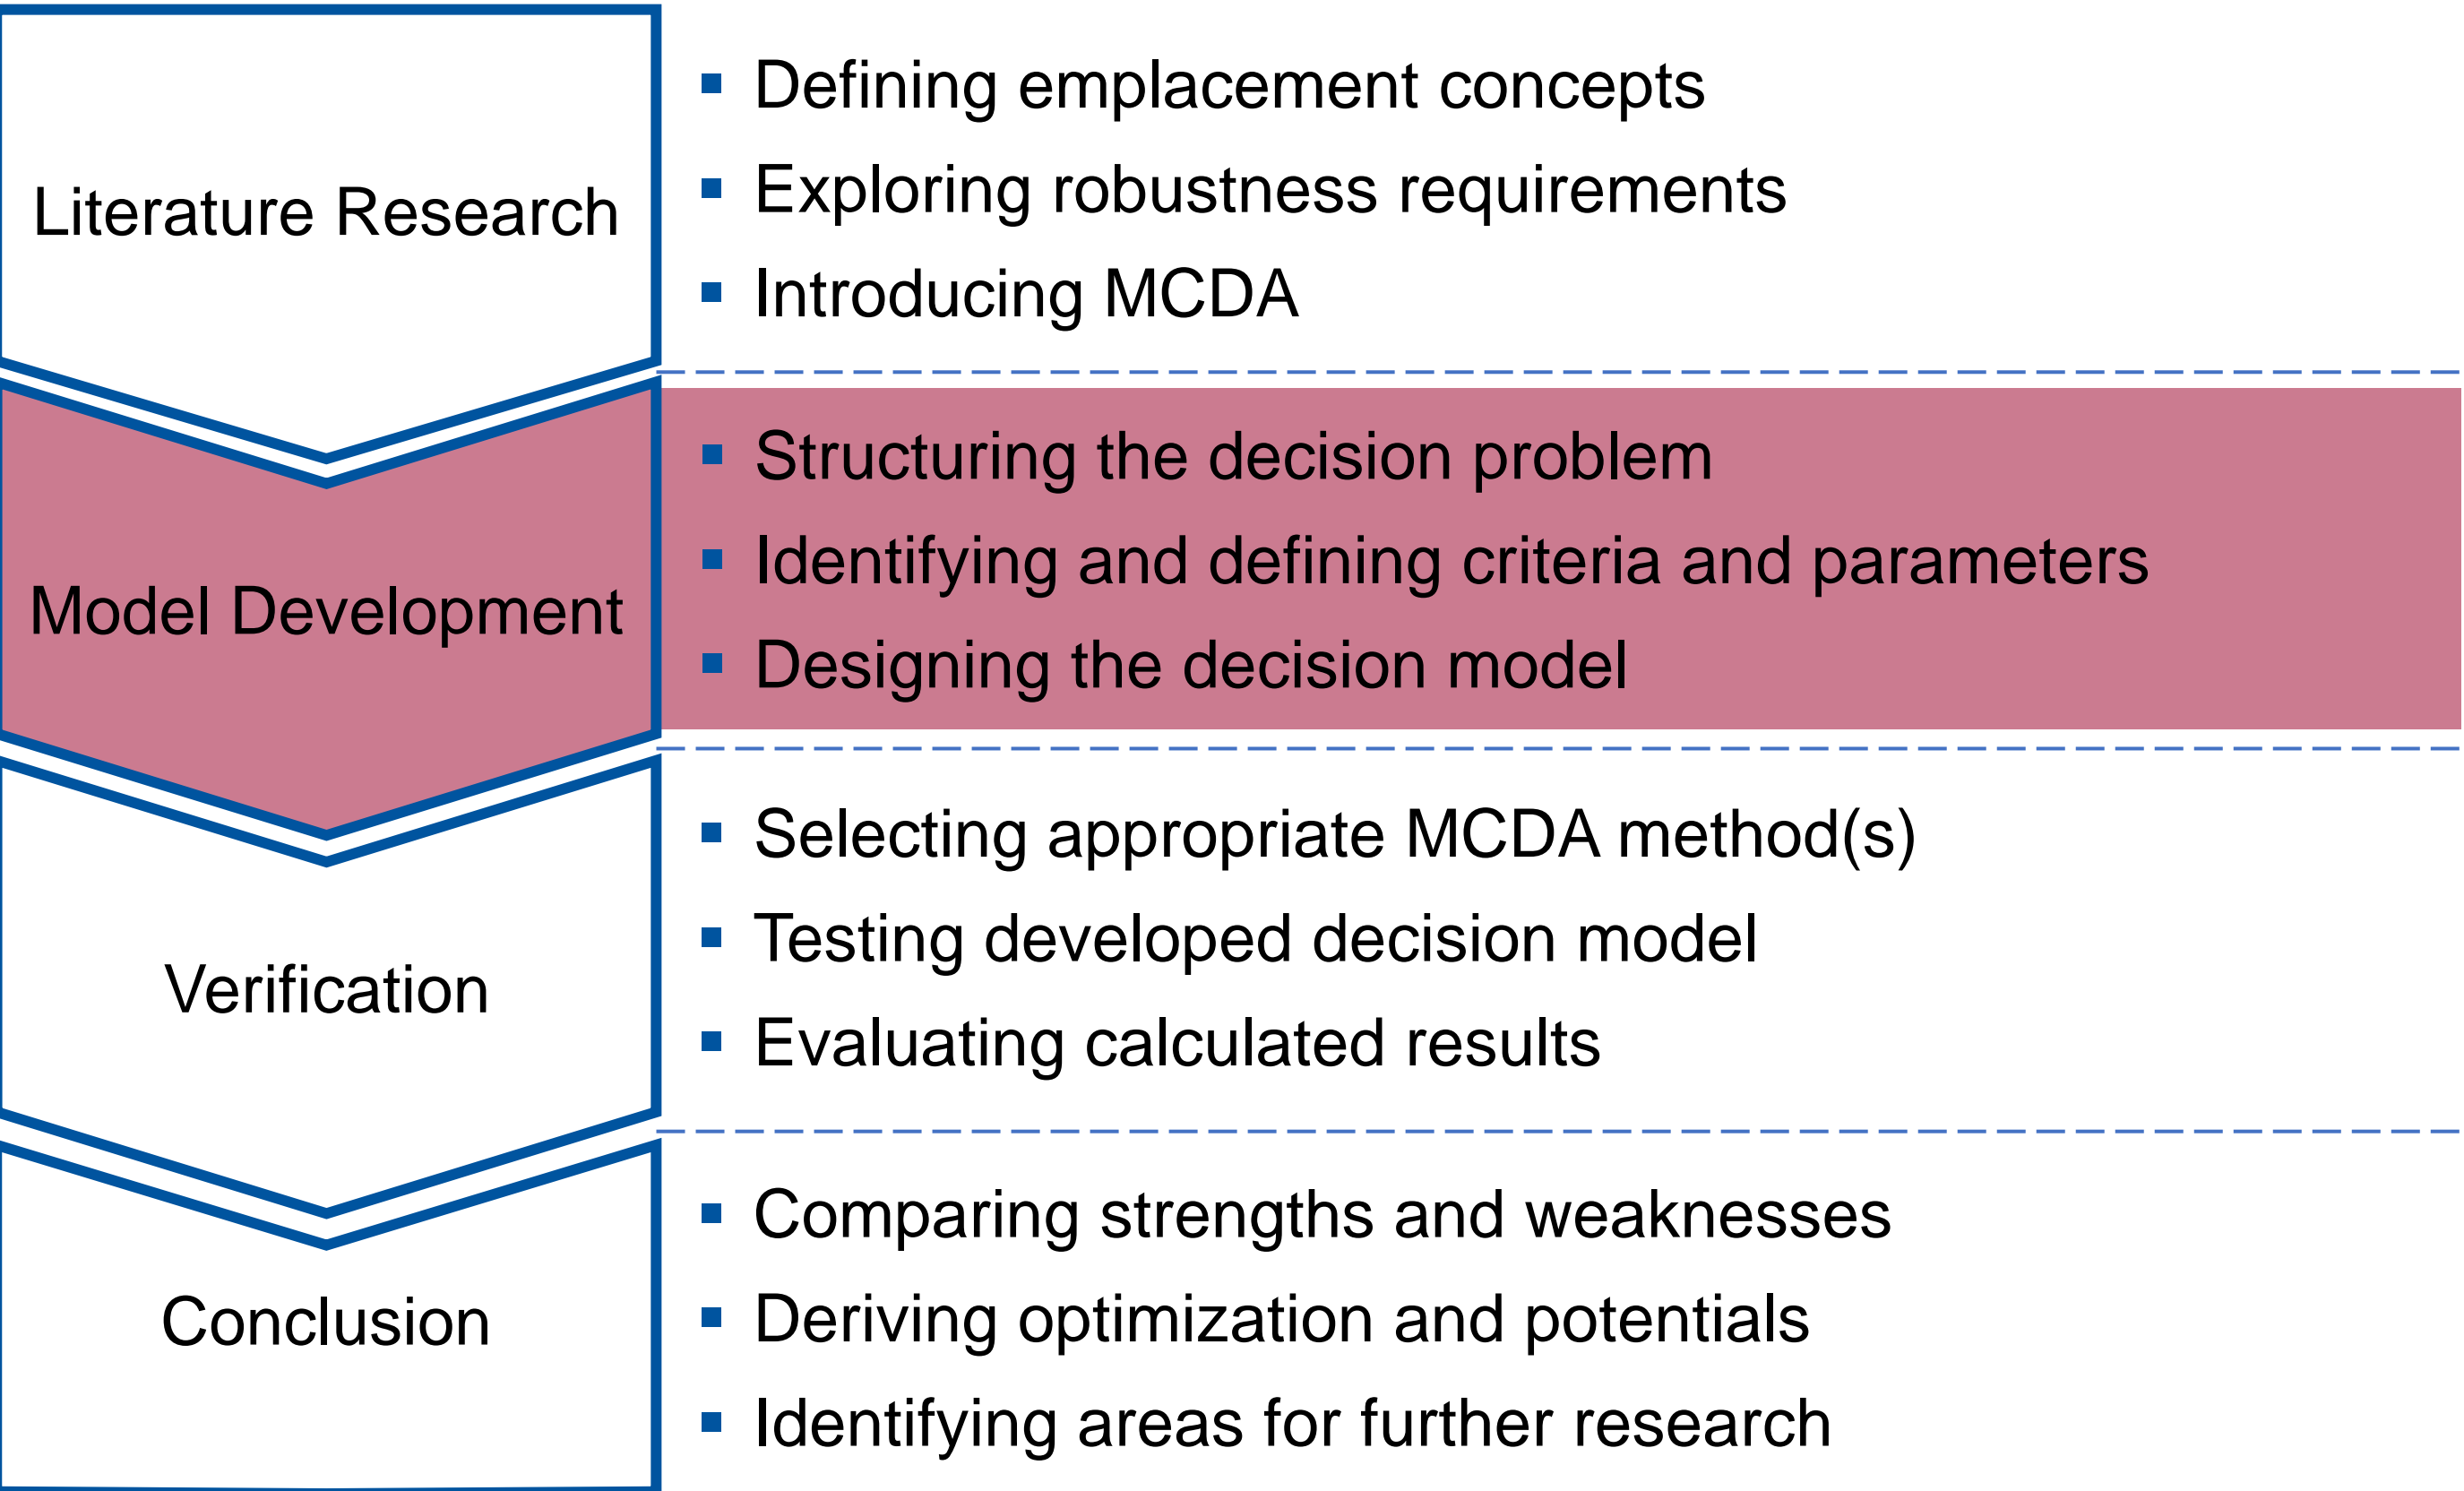

Fig. 4: The four defined methodological work packages including key steps of the doctoral thesis.

#### REFERENCES

Belton, V. and Stewart, T. J.: Multiple criteria decision analysis: An integrated approach, 2. print, Kluwer Acad. Publ, Boston, Mass., 1-12, ISBN: 9780792375050, 2003.

BGE (Bundesgesellschaft für Endlagerung mbH) (Ed.): Methodenbeschreibung zur Durchführung der repräsentativen vorläufigen Sicherheitsuntersuchungen gemäß Endlagersicherheitsuntersuchungsverordnung, Peine, 124-126, 2022.

Frieling, G., Fischer-Appelt, K., Beuth, T., and Bracke, G.: Ressortforschungsberichte zur Sicherheit der nuklearen Entsorgung: Methoden für sicherheitsgerichtete Abwägungen und vergleichende Bewertungen im Standortauswahlverfahren (MABeSt) – Vorhaben 4718F13001, GRS – Gesellschaft für Anlagen- und Reaktorsicherheit, Berlin, 117 and 186, 2020.
