# Supplementary material for: Applicability of multi-criteria decision analysis in the site selection procedure for high-level radioactive waste final disposal: robustness-oriented comparison of emplacement concepts
Source: Copernicus journal article supplement (doi:10.5194/sand-2-169-2023), 2023-09-06
Supplement: Supplementary file 1 [file sand-2-169-2023-supplement.zip › sand-2023-63_Slide_Applicability of Multi-Criteria Decision Analysis_Emplacement Concepts.pdf]

# Applicability of Multi-Criteria Decision Analysis in the Site Selection Procedure for HLW Final Disposal

## Robustness-Oriented Comparison of Emplacement Concepts

Kurt Diedrich  
Klaus Fischer-Appelt  
Frank Charlier  
Sarah Weihmann

Chair of  
Repository Safety (ELS)  
RWTH Aachen  
University

Correspondence to:  
[diedrich@els.rwth-aachen.de](mailto:diedrich@els.rwth-aachen.de)

Second  
interdisciplinary  
research symposium  
on the safety of  
nuclear waste  
management safe<sup>ND</sup>

2023/09/14  
Berlin

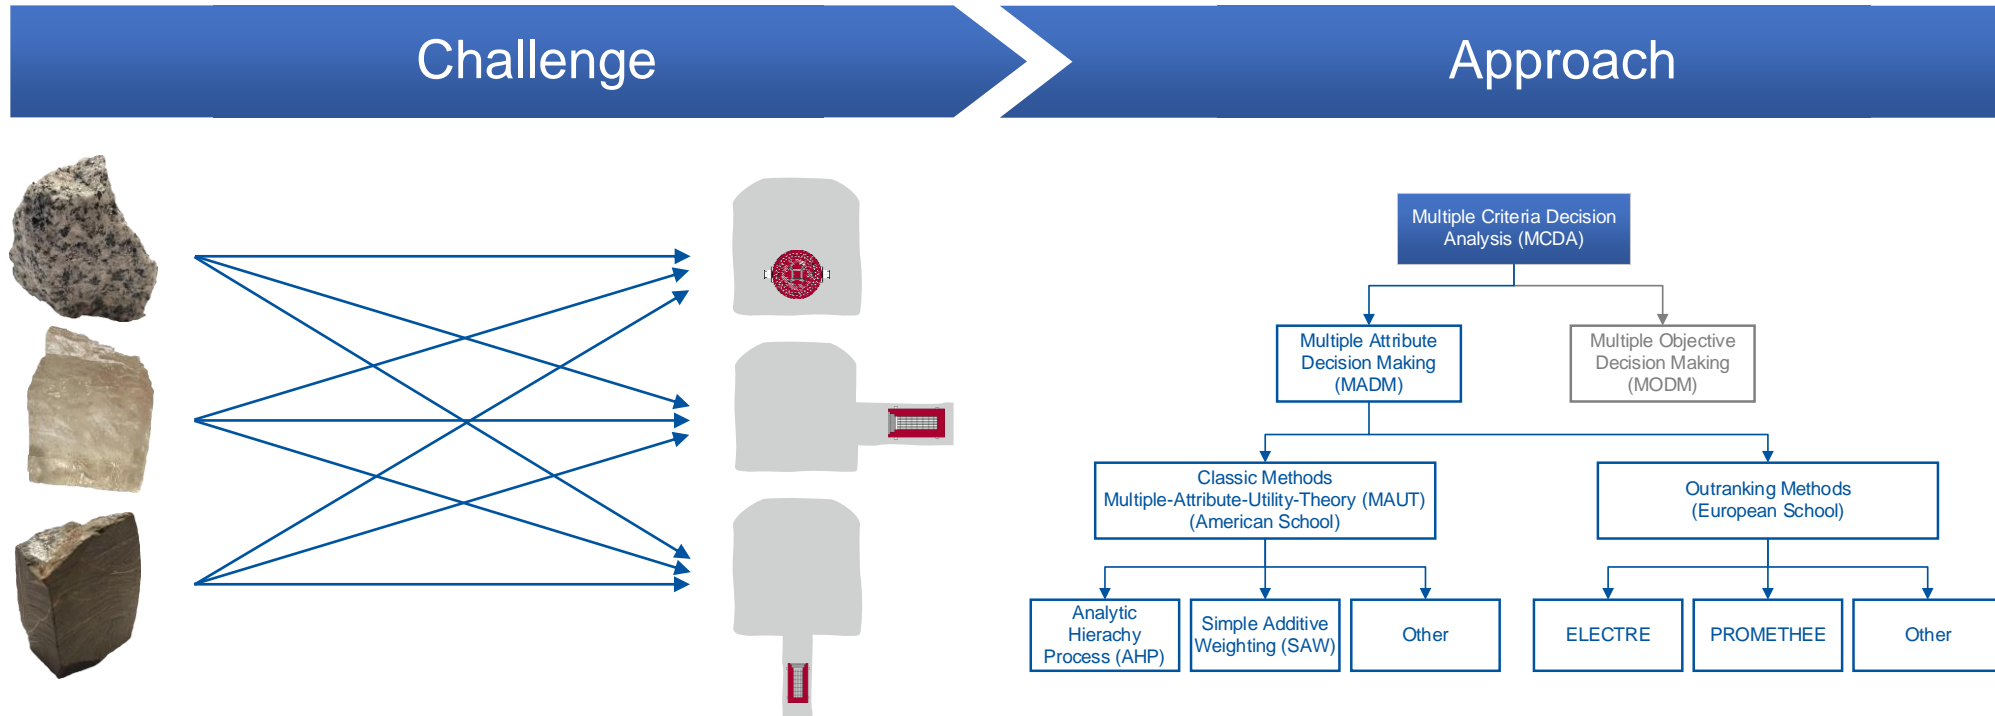

Fig. 1: Sketch of the emplacement concepts decision problem.

Fig. 2: Classification of MCDA methods (adapted from Frieling et al., 2020).

### References

Frieling, G., Fischer-Appelt, K., Beuth, T., and Bracke, G.: Ressortforschungsberichte zur Sicherheit der nuklearen Entsorgung: Methoden für sicherheitsgerichtete Abwägungen und vergleichende Bewertungen im Standortauswahlverfahren (MABeSt) – Vorhaben 4718F13001, GRS – Gesellschaft für Anlagen- und Reaktorsicherheit, Berlin, 117 and 186, 2020.
